# Supplementary material for: Derivation and external validation of clinical prediction rules identifying children at risk of linear growth faltering
Source: eLife journal article supplement (doi:10.7554/elife.78491), 2022-12-29
Supplement: supp1 [file elife-78491-supp1-v2.pdf]

## **Derivation and external validation of clinical prediction rules identifying children at risk of linear growth faltering**

Sharia M. Ahmed<sup>1</sup>, Ben J. Brintz<sup>2</sup>, Patricia B Pavlinac<sup>3</sup>, Lubaba Shahrin<sup>4</sup>, Sayeeda Huq<sup>4</sup>, Adam C. Levine<sup>5</sup>, Eric J. Nelson<sup>6</sup>, James A Platts-Mills<sup>7</sup>, Karen L Kotloff<sup>8</sup>, Daniel T Leung<sup>1</sup>

### **Affiliations:**

1. Division of Infectious Diseases, University of Utah School of Medicine, Salt Lake City, UT, USA
2. Division of Epidemiology, University of Utah School of Medicine, Salt Lake City, UT, USA
3. Department of Global Health, Global Center for Integrated Health of Women, Adolescents and Children (Global WACH), University of Washington, Seattle, WA, USA
4. International Centre for Diarrhoeal Disease Research, Bangladesh, Dhaka, Bangladesh
5. Department of Emergency Medicine, Warren Alpert Medical School of Brown University, Providence, RI, USA
6. Department of Pediatrics and Environmental and Global Health, Emerging Pathogens Institute, University of Florida, Gainesville, FL, USA
7. Division of Infectious Diseases and International Health, University of Virginia, Charlottesville, VA, USA
8. Department of Pediatrics, Center for Vaccine Development, University of Maryland School of Medicine, Baltimore, MD, USA

**SUPPLEMENT**

**Supplementary file 1A: Full list of considered predictor variables**

| GEMS cases                                               | GEMS controls                                          | MAL-ED                                                                |
|----------------------------------------------------------|--------------------------------------------------------|-----------------------------------------------------------------------|
| Study site (site)                                        | Study site (site)                                      | Cumulative diarrheal episode count (diar_epi_ct)                      |
| Child sex (f3_gender)                                    | Your relationship to the child (f7_relation)           | HAZ measurement no more than 31 days before onset of diarrhea (HAZ_1) |
| Loss of skin turgor (f3_drh_turgor)                      | Where child's father lives (f7_dad_live)               | Diarrheal episode duration (days) (diar_dur)                          |
| Intravenous rehydration (f3_drh_iv)                      | Primary caregiver's max school (f7_prim_schl)          | Cumulative days within diarrheal episodes (diar_days_sum)             |
| Hospitalized (f3_drh_hosp)                               | People living in house 6 months (f7_ppl_house)         | Diarrhea duration categorization (diar_dur_cat)                       |
| Your relationship to the child (f4a_relationship)        | Children under 60 months in the house (f7_yng_childrn) | Max loose stools at episode (loose_stool_max)                         |
| Where child's father lives (f4a_dad_live)                | How many rooms used for sleeping (f7_slp_rooms)        | Blood in stool at episode (blood)                                     |
| Primary caregiver's max school (f4a_prim_schl)           | Predominant floor (f7_floor)                           | Days with vomiting at episode (vomit_dur)                             |
| People living in house 6 months (f4a_ppl_house)          | Electricity (f7_house_elec)                            | Days with decreased appetite at episode (app_dec_dur)                 |
| Children under 60 months in the house (f4a_yng_children) | Bicycle/rickshaw (f7_house_bike)                       | Max dehydration categorization (dehyd_max_cat)                        |
| How many rooms used for sleeping (f4a_slp_rooms)         | Telephone (f7_house_phone)                             | Fever at episode categorization (fev_bin)                             |
| Predominant floor (f4a_floor)                            | Television (f7_house_tele)                             | Cumulative days in this ALRI episode (ALRI_dur)                       |
| Electricity (f4a_house_elec)                             | Car/truck (f7_house_car)                               | Age (days) (age)                                                      |
| Bicycle/rickshaw (f4a_house_bike)                        | Animal-drawn cart (f7_house_cart)                      | Total days of breastfeeding (breast_totdays**)                        |
| Telephone (f4a_house_phone)                              | Motorcycle/scooter (f7_house_scoot)                    | Days since last diarrheal episode (diar_days_since)                   |
| Television (f4a_house_tele)                              | Refrigerator (f7_house_fridge)                         | ORT administered, caregiver report (ORT_caregiver)                    |
| Car/truck (f4a_house_car)                                | Agricultural land (f7_house_agland)                    | Hospitalized (hosp)                                                   |
| Animal-drawn cart (f4a_house_cart)                       | Radio (f7_house_radio)                                 | Indrawing, fieldworker assessment (indraw_any)                        |
| Motorcycle/scooter (f4a_house_scoot)                     | Moat with motor (f7_house_boat)                        | Caregiver reported sleepiness (sleepy_any)                            |
| Refrigerator (f4a_house_fridge)                          | None of the above assets (f7_house_none)               | Caregiver reported difficult to awaken (unawake_any)                  |
| Agricultural land (f4a_house_agland)                     | Electricity (f7_fuel_elec)                             | Caregiver reported use of antibiotics (abx_any)                       |
| Radio (f4a_house_radio)                                  | Biogas (f7_fuel_biogas)                                | Caregiver reported use of ORT (ORT_any)                               |
| Boat with motor (f4a_house_boat)                         | Straw/shrubs/grass (f7_fuel_grass)                     | If hospitalized that diarrhea episode (hosp_any)                      |
| None of the above assets (f4a_house_none)                | Liquid propane gas (f7_fuel_propane)                   | First day of the diarrhea episode (first_diar_day)                    |
| Electricity (f4a_fuel_elec)                              | Coal/lignite (f7_fuel_coal)                            |                                                                       |
| Biogas (f4a_fuel_biogas)                                 | Animal dung (f7_fuel_dung)                             |                                                                       |
| Straw/shrubs/grass (f4a_fuel_grass)                      | Natural gas (f7_fuel_natgas)                           |                                                                       |
| Liquid propane gas (f4a_fuel_propane)                    | Charcoal (f7_fuel_charcoal)                            |                                                                       |
| Coal/lignite (f4a_fuel_coal)                             | Agricultural crop residue (f7_fuel_crop)               |                                                                       |
| Animal dung (f4a_fuel_dung)                              | Kerosene (f7_fuel_kero)                                |                                                                       |
| Natural gas (f4a_fuel_natgas)                            | Wood (f7_fuel_wood)                                    |                                                                       |
| Charcoal (f4a_fuel_charcoal)                             | Other fuel (f7_fuel_other)                             |                                                                       |
|                                                          | Goat (f7_ani_goat)                                     |                                                                       |
|                                                          | Sheep (f7_ani_sheep)                                   |                                                                       |

|                                                                                                                                                                                                                                                                                                                                                                                                                                                                                                                                                                                                                                                                                                                                                                                                                                                                                                                                                                                                                                                                                                                                                                                                                                                                                                                                                                                                                                            |                                                                                                                                                                                                                                                                                                                                                                                                                                                                                                                                                                                                                                                                                                                                                                                                                                                                                                                                                                                                                                                                                                                                                                                                                                                                                                                                                                             |                                                                                                                                                                                                                                                                                                                                                                                                                                                                                                                                                                                                                                                                                                                                                                                                                                                                                                                                                                                                                                                                                                                                                                                                                                                                                                                                                |
|--------------------------------------------------------------------------------------------------------------------------------------------------------------------------------------------------------------------------------------------------------------------------------------------------------------------------------------------------------------------------------------------------------------------------------------------------------------------------------------------------------------------------------------------------------------------------------------------------------------------------------------------------------------------------------------------------------------------------------------------------------------------------------------------------------------------------------------------------------------------------------------------------------------------------------------------------------------------------------------------------------------------------------------------------------------------------------------------------------------------------------------------------------------------------------------------------------------------------------------------------------------------------------------------------------------------------------------------------------------------------------------------------------------------------------------------|-----------------------------------------------------------------------------------------------------------------------------------------------------------------------------------------------------------------------------------------------------------------------------------------------------------------------------------------------------------------------------------------------------------------------------------------------------------------------------------------------------------------------------------------------------------------------------------------------------------------------------------------------------------------------------------------------------------------------------------------------------------------------------------------------------------------------------------------------------------------------------------------------------------------------------------------------------------------------------------------------------------------------------------------------------------------------------------------------------------------------------------------------------------------------------------------------------------------------------------------------------------------------------------------------------------------------------------------------------------------------------|------------------------------------------------------------------------------------------------------------------------------------------------------------------------------------------------------------------------------------------------------------------------------------------------------------------------------------------------------------------------------------------------------------------------------------------------------------------------------------------------------------------------------------------------------------------------------------------------------------------------------------------------------------------------------------------------------------------------------------------------------------------------------------------------------------------------------------------------------------------------------------------------------------------------------------------------------------------------------------------------------------------------------------------------------------------------------------------------------------------------------------------------------------------------------------------------------------------------------------------------------------------------------------------------------------------------------------------------|
| <p>Agricultural crop residue (f4a_fuel_crop)</p> <p>Kerosene (f4a_fuel_kero)</p> <p>Wood (f4a_fuel_wood)</p> <p>Other fuel (f4a_fuel_other)</p> <p>Goat (f4a_animal_goat)</p> <p>Sheep (f4a_animal_sheep)</p> <p>Dog (f4a_animal_dog)</p> <p>Cat (f4a_animal_cat)</p> <p>Cow (f4a_animal_cow)</p> <p>Rodents (f4a_animal_rodents)</p> <p>Fowl (f4a_animal_fowl)</p> <p>Other animal (f4a_animal_other)</p> <p>No animals (f4a_animal_no)</p> <p>Water piped to house (f4a_water_house)</p> <p>Covered well in house/yard (f4a_water_covwell)</p> <p>Water piped into yard (f4a_water_yard)</p> <p>Covered public well (f4a_water_covpwell)</p> <p>Public tap (f4a_water_pubtap)</p> <p>Protected spring (f4a_water_prospring)</p> <p>Open well in house/yard (f4a_water_well)</p> <p>Unprotected spring (f4a_water_unspring)</p> <p>Open public well (f4a_water_pubwell)</p> <p>River/stream (f4a_water_river)</p> <p>Pond/lake (f4a_water_pond)</p> <p>Deep tube well (f4a_water_deepwell)</p> <p>Rainwater (f4a_water_rain)</p> <p>Shallow tube well (f4a_water_shallowwell)</p> <p>Bought water (f4a_water_bought)</p> <p>Other water source (f4a_water_othr)</p> <p>Bore hole (f4a_water_bore)</p> <p>Main source of drinking water (f4a_ms_water*)</p> <p>How often is water available (f4a_water_avail)</p> <p>Did you give the child stored water (f4a_store_water)</p> <p>Do you usually treat drinking water? (f4a_trt_water)</p> | <p>Dog (f7_animal_dog)</p> <p>Cat (f7_animal_cat)</p> <p>Cow (f7_animal_cow)</p> <p>Rodents (f7_animal_rodents)</p> <p>Fowl (f7_animal_fowl)</p> <p>Other animals (f7_animal_other)</p> <p>No animals (f7_animal_no)</p> <p>Water piped to house (f7_water_house)</p> <p>Covered well in house/yard (f7_water_covwell)</p> <p>Water piped into yard (f7_water_yard)</p> <p>Covered public well (f7_water_covpwell)</p> <p>Public tap (f7_water_pubtap)</p> <p>Protected spring (f7_water_prospring)</p> <p>Open well in house/yard (f7_water_well)</p> <p>Unprotected spring (f7_water_unspring)</p> <p>Open public well (f7_water_pubwell)</p> <p>River/stream (f7_water_river)</p> <p>Pond/lake (f7_water_pond)</p> <p>Deep tube well (f7_water_deepwell)</p> <p>Rainwater (f7_water_rain)</p> <p>Shallow tube well (f7_water_shallowwell)</p> <p>Bought water (f7_water_bought)</p> <p>Other water source (f7_water_othr)</p> <p>Bore hole (f7_water_bore)</p> <p>Main source of drinking water (f7_ms_water*)</p> <p>How often is water available (f7_water_avail)</p> <p>Did you give the child stored water? (f7_store_water)</p> <p>Do you usually treat drinking water? (f7_trt_water)</p> <p>Do you usually treat drinking water? (f7_trt_method)</p> <p>How are child's feces disposed (f7_disp_feces)</p> <p>Facility use to dispose of feces (f7_fac_waste)</p> | <p>Breastfed within first 24hr of birth (breast_24)</p> <p>Time between birth and first breastfeeding (time_to_breast)</p> <p>Fed colostrum (colostrum)</p> <p>Prelacteal feeding (prelacteal)</p> <p>Sex (sex)</p> <p>Total days in all diarrheal episodes (tot_diar)</p> <p>Drinking water source (water_source)</p> <p>Persons sleeping in dwelling (ppl_slp)</p> <p>Mean people per room (mean_ppl)</p> <p>Improved/unimproved sanitation (sani_score)</p> <p>Improve/unimproved drinking water (water_score)</p> <p>Household has a bed (bed)</p> <p>Household has a television (tv)</p> <p>Household has a refrigerator (fridge)</p> <p>Household has a table (table)</p> <p>Household has a chair (chair)</p> <p>Main material of roof (roof)</p> <p>Main material of floor (floor)</p> <p>Main material of walls (wall)</p> <p>Household has a bank account (bank)</p> <p>Kitchen located in a separate room (kitchen)</p> <p>Years of formal education mother received (edu)</p> <p>Mother ever attended formal schooling (edu2)</p> <p>Total number of rooms in house (rm_ct)</p> <p>Noniles of average monthly household income in USD (income_score)</p> <p>Fewer than 2 people per room (two_ppl_rm)</p> <p>Toilet/latrine has concrete floor (sani_concrete)</p> <p>Toilet/latrine type (sani_type)</p> <p>Country (country)</p> |
|--------------------------------------------------------------------------------------------------------------------------------------------------------------------------------------------------------------------------------------------------------------------------------------------------------------------------------------------------------------------------------------------------------------------------------------------------------------------------------------------------------------------------------------------------------------------------------------------------------------------------------------------------------------------------------------------------------------------------------------------------------------------------------------------------------------------------------------------------------------------------------------------------------------------------------------------------------------------------------------------------------------------------------------------------------------------------------------------------------------------------------------------------------------------------------------------------------------------------------------------------------------------------------------------------------------------------------------------------------------------------------------------------------------------------------------------|-----------------------------------------------------------------------------------------------------------------------------------------------------------------------------------------------------------------------------------------------------------------------------------------------------------------------------------------------------------------------------------------------------------------------------------------------------------------------------------------------------------------------------------------------------------------------------------------------------------------------------------------------------------------------------------------------------------------------------------------------------------------------------------------------------------------------------------------------------------------------------------------------------------------------------------------------------------------------------------------------------------------------------------------------------------------------------------------------------------------------------------------------------------------------------------------------------------------------------------------------------------------------------------------------------------------------------------------------------------------------------|------------------------------------------------------------------------------------------------------------------------------------------------------------------------------------------------------------------------------------------------------------------------------------------------------------------------------------------------------------------------------------------------------------------------------------------------------------------------------------------------------------------------------------------------------------------------------------------------------------------------------------------------------------------------------------------------------------------------------------------------------------------------------------------------------------------------------------------------------------------------------------------------------------------------------------------------------------------------------------------------------------------------------------------------------------------------------------------------------------------------------------------------------------------------------------------------------------------------------------------------------------------------------------------------------------------------------------------------|

|                                                                                                                                                                                                                                                                                                                                                                                                                                                                                                                                                                                                                                                                                                                                                                                                                                                                                                                                                                                                                                                                                                                                                                                                                                                                                                                                                                                                                                                                                                                                                          |                                                                                                                                                                                                                                                                                                                                                                                                                                                                                                                                                                                                                                                                                                                                                                                                                                                                                                                               |  |
|----------------------------------------------------------------------------------------------------------------------------------------------------------------------------------------------------------------------------------------------------------------------------------------------------------------------------------------------------------------------------------------------------------------------------------------------------------------------------------------------------------------------------------------------------------------------------------------------------------------------------------------------------------------------------------------------------------------------------------------------------------------------------------------------------------------------------------------------------------------------------------------------------------------------------------------------------------------------------------------------------------------------------------------------------------------------------------------------------------------------------------------------------------------------------------------------------------------------------------------------------------------------------------------------------------------------------------------------------------------------------------------------------------------------------------------------------------------------------------------------------------------------------------------------------------|-------------------------------------------------------------------------------------------------------------------------------------------------------------------------------------------------------------------------------------------------------------------------------------------------------------------------------------------------------------------------------------------------------------------------------------------------------------------------------------------------------------------------------------------------------------------------------------------------------------------------------------------------------------------------------------------------------------------------------------------------------------------------------------------------------------------------------------------------------------------------------------------------------------------------------|--|
| <p>Usual treatment method<br/>(f4a_trt_method)</p> <p>How are child's feces disposed<br/>(f4a_disp_feces)</p> <p>Facility used to dispose of feces<br/>(f4a_fac_waste)</p> <p>How many households share<br/>facility? (f4a_share_fac)</p> <p>Wash hands before eating?<br/>(f4a_wash_eat)</p> <p>Wash hands before cooking<br/>(f4a_wash_cook)</p> <p>Wash hands before you nurse?<br/>(f4a_wash_nurse)</p> <p>Wash hands after you defecate<br/>(f4a_wash_def)</p> <p>Wash hands after handling animals<br/>(f4a_wash_animal)</p> <p>Wash hands after cleaning a child<br/>(f4a_wash_child)</p> <p>Wash hands other times<br/>(f4a_wash_othr)</p> <p>What do you use to wash your<br/>hands? (f4a_wash_use)</p> <p>Is the child currently breastfed?<br/>(f4a_breastfed)</p> <p>How long as this diarrhea episode<br/>lasted (days)? (f4a_drh_days)</p> <p>Maximum number of loose stools<br/>(f4a_max_stools)</p> <p>Blood in stools (f4a_drh_blood)</p> <p>Vomiting 3 or more times per day<br/>(f4a_drh_vomit)</p> <p>Very thirsty (f4a_drh_thirst)</p> <p>Drank much less than usual<br/>(f4a_drh_lessdrink)</p> <p>Belly pain (f4a_drh_bellypain)</p> <p>Irritable or restless<br/>(f4a_drh_restless)</p> <p>Decreased activity or lethargy<br/>(f4a_drh_lethrgy)</p> <p>Loss of consciousness<br/>(f4a_drh_consc)</p> <p>Rectal straining (f4a_drh_strain)</p> <p>Rectal prolapse (f4a_drh_prolapse)</p> <p>Cough (f4a_drh_cough)</p> <p>Convulsions (f4a_drh_conv)</p> <p>Very thirsty (f4a_cur_thirsty)</p> <p>Wrinkled skin (f4a_cur_skin)</p> | <p>Wash hands before eating?<br/>(f7_wash_eat)</p> <p>Wash hands before cooking?<br/>(f7_wash_cook)</p> <p>Wash hands before you nurse<br/>(f7_wash_nurse)</p> <p>Wash hands after you defecate?<br/>(f7_wash_def)</p> <p>Wash hands after handling<br/>animals? (f7_wash_animal)</p> <p>Wash hands after cleaning child?<br/>(f7_wash_child)</p> <p>Wash hands other times?<br/>(f7_wash_othr)</p> <p>What do you use to wash your<br/>hands? (f7_wash_use)</p> <p>Is the child currently<br/>breastfeeding? (f7_breastfed)</p> <p>Seek outside care? (f7_seekcare)</p> <p>Length/height-for-age z-score<br/>(f7_haz)</p> <p>Axillary temperature (f7_temp)</p> <p>Calculated respiratory rate<br/>(f7_resp)</p> <p>Bipedal edema (f7_bipedal)</p> <p>Abnormal hair (f7_abn_hair)</p> <p>Undernutrition (f7_under_nutr)</p> <p>Skin as 'flaky paint' appearance<br/>(f7_skin_flaky)</p> <p>Child age (months) (base_age)</p> |  |
|----------------------------------------------------------------------------------------------------------------------------------------------------------------------------------------------------------------------------------------------------------------------------------------------------------------------------------------------------------------------------------------------------------------------------------------------------------------------------------------------------------------------------------------------------------------------------------------------------------------------------------------------------------------------------------------------------------------------------------------------------------------------------------------------------------------------------------------------------------------------------------------------------------------------------------------------------------------------------------------------------------------------------------------------------------------------------------------------------------------------------------------------------------------------------------------------------------------------------------------------------------------------------------------------------------------------------------------------------------------------------------------------------------------------------------------------------------------------------------------------------------------------------------------------------------|-------------------------------------------------------------------------------------------------------------------------------------------------------------------------------------------------------------------------------------------------------------------------------------------------------------------------------------------------------------------------------------------------------------------------------------------------------------------------------------------------------------------------------------------------------------------------------------------------------------------------------------------------------------------------------------------------------------------------------------------------------------------------------------------------------------------------------------------------------------------------------------------------------------------------------|--|

|                                                                                                                                                                                                                                                                                                                                                                                                                                                                                                                                                                                                                                                                                                                                                                                                                                                                                                                                                                                                                                                                                                                                                                                                                                                                 |  |  |
|-----------------------------------------------------------------------------------------------------------------------------------------------------------------------------------------------------------------------------------------------------------------------------------------------------------------------------------------------------------------------------------------------------------------------------------------------------------------------------------------------------------------------------------------------------------------------------------------------------------------------------------------------------------------------------------------------------------------------------------------------------------------------------------------------------------------------------------------------------------------------------------------------------------------------------------------------------------------------------------------------------------------------------------------------------------------------------------------------------------------------------------------------------------------------------------------------------------------------------------------------------------------|--|--|
| Irritable or restless<br>(f4a_cur_restless)<br>Dry mouth (f4a_cur_drymouth)<br>Fast breathing (f4a_cur_fastbreath)<br>ORALITE or ORS<br>(f4a_hometrt_ors)<br>Homemade fluid<br>(f4a_hometrt_maize)<br>Special milk or infant formula<br>(f4a_hometrt_milk)<br>Home remedy/herbal medication<br>(f4a_hometrt_herb)<br>Zinc (f4a_hometrt_zinc)<br>No special remedies given<br>(f4a_hometrt_none)<br>Any other liquids<br>(f4a_hometrt_othrliq)<br>Antibiotics (f4a_hometrt_ab)<br>Other treatment<br>(f4a_hometrt_othr1)<br>Other treatment<br>(f4a_hometrt_othr2)<br>How much offered to drink<br>(f4a_offr_drink)<br>Seek outside care<br>(f4a_seek_outside)<br>Pharmacy (f4a_seek_pharm)<br>Friend/relative (f4a_seek_friend)<br>Traditional healer<br>(f4a_seek_healer)<br>Unlicensed practitioner<br>(f4a_seek_doc)<br>Licensed practitioner<br>(f4a_seek_privdoc)<br>Bought a remedy<br>(f4a_seek_remdy)<br>Other hospital/center<br>(f4a_seek_other)<br>Length/height-for-age z-score<br>(f4b_haz)<br>Axillary temperature (f4b_temp)<br>Respiratory rate per minute<br>(f4b_resp)<br>Chest indrawing<br>(f4b_chest_indrw)<br>Eyes (f4b_eyes)<br>Mouth (f4b_mouth)<br>Skin pinch (f4b_skin)<br>Mental status (f4b_mental)<br>Rectal prolapse (f4b_rectal) |  |  |
|-----------------------------------------------------------------------------------------------------------------------------------------------------------------------------------------------------------------------------------------------------------------------------------------------------------------------------------------------------------------------------------------------------------------------------------------------------------------------------------------------------------------------------------------------------------------------------------------------------------------------------------------------------------------------------------------------------------------------------------------------------------------------------------------------------------------------------------------------------------------------------------------------------------------------------------------------------------------------------------------------------------------------------------------------------------------------------------------------------------------------------------------------------------------------------------------------------------------------------------------------------------------|--|--|

|                                                                                                                                                                                                                                                                                                                                                                               |  |  |
|-------------------------------------------------------------------------------------------------------------------------------------------------------------------------------------------------------------------------------------------------------------------------------------------------------------------------------------------------------------------------------|--|--|
| Bipedal edema (f4b_bipedal)<br>Abnormal hair (f4b_abn_hair)<br>Undernutrition (f4b_under_nutr)<br>Skin as 'flaky paint' appearance (f4b_skin_flaky)<br>Staff observed a stool sample (f4b_observe_stool)<br>Nature of the stool (f4b_nature_stool)<br>Receive rehydration here (f4b_recommend)<br>Child was admitted to hospital (f4b_admit)<br>Child age (months) (base_age) |  |  |
|-------------------------------------------------------------------------------------------------------------------------------------------------------------------------------------------------------------------------------------------------------------------------------------------------------------------------------------------------------------------------------|--|--|

\*f4a\_ms\_water and f7\_ms\_water were recategorized into the following: surface, other unimproved, other improved, piped, other(1, 2)

\*\*breast\_totdays is calculated from the cumulative number of days of each of the following types of breastfeeding, combined using the listed formula: exclusive, predominant, partial, and none;  
 $breast\_totdays = (breast\_excl * 1) + (breast\_predom * 0.75) + (breast\_part * 0.5) + (breast\_not * 0)$

Supplementary file 1B: Total sample size and growth faltering in GEMS by site

| N's                      | The Gambia  | Mali        | Mozambique  | Kenya       | India       | Bangladesh  | Pakistan    |
|--------------------------|-------------|-------------|-------------|-------------|-------------|-------------|-------------|
| Median HAZ at enrollment | -1.2        | -0.9        | -1.2        | -1.3        | -1.3        | -1.2        | -1.9        |
| ≥0.5 decrease in HAZ     | 251 (31.9%) | 255 (14.9%) | 145 (34.5%) | 296 (28.4%) | 269 (18.5%) | 304 (23.1%) | 224 (24.9%) |
| ≥1.0 decrease in HAZ     | 48 (6.1%)   | 51 (3.0%)   | 42 (10.0%)  | 76 (7.3%)   | 55 (3.8%)   | 38 (2.9%)   | 47 (5.2%)   |
| Total                    | 788         | 1715        | 420         | 1042        | 1457        | 1316        | 901         |

Supplementary file 1C: Total Sample size and growth faltering in GEMS by age

| N's                  | 0-11mo       | 12-23mo     | 24-59mo   |
|----------------------|--------------|-------------|-----------|
| ≥0.5 decrease in HAZ | 1077 (33.7%) | 584 (22.3%) | 83 (4.6%) |
| ≥1.0 decrease in HAZ | 293 (9.2%)   | 64 (2.4%)   | 0 (0%)    |
| Total                | 3196         | 2622        | 1821      |

Supplementary file 1D: Variable importance ordering, cross-validated average AUC, odds ratios, and 95% confidence intervals for logistic regression models predicting growth faltering ( $\geq 0.5$  decrease in HAZ) in children 0-59mo in LMICs in GEMS and MAL-ED ranked from most to less predictive (highest to lower variance reduction)

| GEMS 0-59mo                                               |                   | MAL-ED 0-23mo                                                     |                   |
|-----------------------------------------------------------|-------------------|-------------------------------------------------------------------|-------------------|
| AUC (95% CI): 0.72 (0.719, 0.724)                         |                   | AUC (95% CI): 0.68 (0.67, 0.69)                                   |                   |
| Variables                                                 | OR (95% CI)       | Variables                                                         | OR (95% CI)       |
| Age (months)                                              | 0.92 (0.91, 0.93) | HAZ                                                               | 1.35 (1.17, 1.55) |
| HAZ                                                       | 1.30 (1.24, 1.36) | Age (days)                                                        | 1.00 (1.00, 1.00) |
| Respiratory rate                                          | 1.00 (0.99, 1.00) | Total days breastfed                                              | 1.00 (1.00, 1.01) |
| Temperature                                               | 1.28 (1.21, 1.36) | Tot. days with diarrhea during study (tot_diar)                   | 0.98 (0.97, 1.00) |
| Num. ppl living in household                              | 1.00 (0.99, 1.01) | Mean num. people per room                                         | 1.05 (0.94, 1.16) |
| Num. ppl sleeping in household                            | 1.00 (0.98, 1.03) | Num. days of diarrhea in lifetime at presentation (diar_days_sum) | 1.02 (0.99, 1.04) |
| Num. days of diarrhea at presentation                     | 0.98 (0.93, 1.02) | Maternal education (years)                                        | 0.95 (0.91, 1.00) |
| Num. other households share fecal waste disposal facility | 0.99 (0.97, 1.00) | Num. days since last diarrhea episode (diar_days_since)           | 1.00 (1.00, 1.00) |
| Currently breastfeeding                                   | 0.85 (0.74, 0.97) | Num. ppl. sleep in dwelling                                       | 1.07 (1.01, 1.12) |
| Num. children <60months live in household                 | 0.99 (0.95, 1.03) | Max. num. loose stools per day in this diarrhea episode           | 0.93 (0.86, 1.00) |
| 2-variable model fit to 0-23mo                            |                   |                                                                   |                   |
| AUC (95% CI): 0.63 (0.62, 0.65)                           |                   |                                                                   |                   |
| Age (months)                                              | 0.95 (0.94, 0.96) |                                                                   |                   |
| HAZ                                                       | 1.31 (1.25, 1.38) |                                                                   |                   |

Supplementary file 1E: **GROWTH FALTERING**: Variable importance ordering and cross-validated average overall AUC and AUC by patient subset and 95% confidence intervals for a 2 (plain text), 5 (bold), and 10 (italicized) variable logistic regression model for predicting growth faltering in children derived in GEMS and MAL-ED data ( $\geq 0.5$  decrease in HAZ)

| Data           | GEMS                            | GEMS                                | MAL-ED                                            | GEMS                            | MAL-ED                                            | GEMS                             | MAL-ED                                            | GEMS                                                       | GEMS                                        |
|----------------|---------------------------------|-------------------------------------|---------------------------------------------------|---------------------------------|---------------------------------------------------|----------------------------------|---------------------------------------------------|------------------------------------------------------------|---------------------------------------------|
| Patient Subset | 0-59mo (main text model)        | 0-11mo                              | 0-11mo                                            | 12-23mo                         | 12-23mo                                           | 0-23mo (for external validation) | 0-23mo                                            | 24-59mo                                                    | 0-59mo outcome is any stunting at follow-up |
| AUCs           | <b>0.72 (0.72, 0.72)</b>        | <b>0.60 (0.59, 0.60)</b>            | <b>0.60 (0.60, 0.61)</b>                          | <b>0.66 (0.65, 0.66)</b>        | <b>0.65 (0.64, 0.66)</b>                          | <b>0.64 (0.63, 0.64)</b>         | <b>0.62 (0.61, 0.63)</b>                          | <b>0.78 (0.77, 0.79)</b>                                   | <b>0.96 (0.96, 0.96)</b>                    |
|                | <i>0.72 (0.71, 0.73)</i>        | <i>0.60 (0.59, 0.60)</i>            | <i>0.63 (0.62, 0.63)</i>                          | <i>0.70 (0.69, 0.70)</i>        | <i>0.64 (0.63, 0.65)</i>                          | <i>0.64 (0.64, 0.64)</i>         | <i>0.63 (0.62, 0.64)</i>                          | <i>0.76 (0.75, 0.77)</i>                                   | <i>0.96 (0.96, 0.97)</i>                    |
| 1              | Age (months)                    | HAZ                                 | HAZ                                               | HAZ                             | Age (days)                                        | HAZ                              | HAZ                                               | Temp                                                       | HAZ                                         |
| 2              | HAZ                             | Temp                                | Total days breastfeeding                          | Respiratory rate                | HAZ                                               | Age (months)                     | Age (days)                                        | Respiratory rate                                           | Age (months)                                |
| 3              | Respirator rate                 | Respiratory rate                    | Age (days)                                        | Temp                            | Total days breastfeeding                          | Temperature                      | Total days breastfeeding                          | Age (months)                                               | Wasted / very thin                          |
| 4              | Temperature                     | Num. people living in household     | Tot. days with diarrhea during study              | Age (months)                    | Tot. days with diarrhea during study              | Respiratory rate                 | Tot. days with diarrhea during study              | HAZ                                                        | Respiratory rate                            |
| 5              | Num. people living in household | Age (months)                        | Mean num. of people per room                      | Num. people living in household | Num. days since last diarrhea episode             | Num. people living in household  | Mean num. people per room                         | Num. people living in household                            | Temperature                                 |
| 6              | Num. rooms used for sleeping    | Num. other households share latrine | Num. days of diarrhea in lifetime at presentation | Num. rooms used for sleeping    | Num. days of diarrhea in lifetime at presentation | Num. rooms used for sleeping     | Num. days of diarrhea in lifetime at presentation | Num. other households that share same fecal waste facility | Num. people living in household             |



|    |                                                            |                                           |                                                        |                                                            |                                       |                                                            |                                               |                                                |                                                            |
|----|------------------------------------------------------------|-------------------------------------------|--------------------------------------------------------|------------------------------------------------------------|---------------------------------------|------------------------------------------------------------|-----------------------------------------------|------------------------------------------------|------------------------------------------------------------|
| 7  | Num. days of diarrhea at presentation                      | Num. days of diarrhea at presentation     | Num. ppl. sleep in dwelling                            | Received recommended rehydration at health center          | Mean num. people per room             | Num. days of diarrhea at presentation                      | Num. ppl. Sleep in dwelling                   | Num. days of diarrhea at presentation          | Site                                                       |
| 8  | Num. other households that share same fecal waste facility | Num. rooms used for sleeping              | Max num. loose stools per day in this diarrhea episode | Num. days of diarrhea at presentation                      | Maternal education (years)            | Num. other households that share same fecal waste facility | Maternal education (years)                    | Num. rooms used for sleeping                   | Num. other households that share same fecal waste facility |
| 9  | Breastfed                                                  | Num. children <60months live in household | Maternal education (years)                             | Num. other households that share same fecal waste facility | Num. ppl sleep in dwelling            | Num. children <60 months live in household                 | Num. days since last diarrhea episode         | Num. children <60months live in household      | Num. rooms used for sleeping                               |
| 10 | Num. children <60months live in household                  | Caregiver education                       | Num. days since last diarrhea episode                  | Num. children <60months live in household                  | Num. of diarrhea episodes in lifetime | Caregiver education                                        | Avg. monthly household income in USD, noniles | Type of fecal waste facility used by household | Num. days of diarrhea at presentation                      |

| Data                        | GEMS                                                       | GEMS                                                       | GEMS                                                       | GEMS                                                       | GEMS                                                                                                       | GEMS                                                       |
|-----------------------------|------------------------------------------------------------|------------------------------------------------------------|------------------------------------------------------------|------------------------------------------------------------|------------------------------------------------------------------------------------------------------------|------------------------------------------------------------|
| Patient Subset              | 0-59mo (main text model) only HAZ considered               | Only MUAC considered                                       | HAZ + MUAC considered                                      | main + month of diarrhea                                   | Abx (b/f, during, rx, ever)                                                                                | $\geq 1.0 \Delta$ HAZ in 0-59mo                            |
| AUCs                        | <b>0.72 (0.72, 0.72)</b>                                   | <b>0.70 (0.70, 0.70)</b>                                   | <b>0.72 (0.72, 0.73)</b>                                   | <b>0.72 (0.72, 0.72)</b>                                   | <b>0.72 (0.72, 0.72)</b>                                                                                   | <b>0.80 (0.79, 0.80)</b>                                   |
|                             | <i>0.72 (0.71, 0.73)</i>                                   | <i>0.70 (0.70, 0.70)</i>                                   | <i>0.72 (0.72, 0.73)</i>                                   | <i>0.72 (0.72, 0.72)</i>                                   | <i>0.72 (0.72, 0.72)</i>                                                                                   | <i>0.80 (0.79, 0.80)</i>                                   |
| 1                           | Age (months)                                               | Age (months)                                               | Age (months)                                               | Age (months)                                               | Age (months)                                                                                               | Age (months)                                               |
| 2                           | HAZ                                                        | MUAC                                                       | HAZ                                                        | HAZ                                                        | HAZ                                                                                                        | HAZ                                                        |
| 3                           | Respirator rate                                            | Respiratory rate                                           | MUAC                                                       | Respiratory rate                                           | Respiratory rate                                                                                           | Respiratory rate                                           |
| 4                           | Temperature                                                | Temperature                                                | Respiratory rate                                           | Temperature                                                | Temperature                                                                                                | Temperature                                                |
| 5                           | Num. people living in household                            | Num. people living in household                            | Temperature                                                | Num. people living in household                            | Num. people living in household                                                                            | Num. people living in household                            |
| 6                           | Num. rooms used for sleeping                               | Num. days of diarrhea at presentation                      | Num. people living in household                            | Month                                                      | Num. rooms used for sleeping                                                                               | Num. other households that share same fecal waste facility |
| 7                           | Num. days of diarrhea at presentation                      | Num. rooms used for sleeping                               | Num. rooms used for sleeping                               | Num. rooms used for sleeping                               | Num. days of diarrhea at presentation                                                                      | Num. rooms used for sleeping                               |
| 8                           | Num. other households that share same fecal waste facility | Num. other households that share same fecal waste facility | Num. days of diarrhea at presentation                      | Num. days of diarrhea at presentation                      | Num. other households that share same fecal waste facility                                                 | Num. days of diarrhea at presentation                      |
| 9                           | Breastfed                                                  | Breastfed                                                  | Num. other households that share same fecal waste facility | Num. other households that share same fecal waste facility | Breastfed                                                                                                  | Num. children <60months live in household                  |
| 10                          | Num. children <60months live in household                  | Num. children <60months live in household                  | Breastfed                                                  | Breastfed                                                  | Num. children <60months live in household                                                                  | Breastfed                                                  |
| Rank of additional variable | N/A                                                        | N/A                                                        | N/A                                                        | 6 <sup>th</sup>                                            | 62 <sup>nd</sup> (rx)<br>71 <sup>st</sup> (during)<br>78 <sup>th</sup> (ever)<br>84 <sup>th</sup> (before) | N/A                                                        |

|                                                                  |                                              |                                              |                                              |                                               |                                              |                                              |                                              |                                               |                                              |                                              |                                              |                                               |                                              |
|------------------------------------------------------------------|----------------------------------------------|----------------------------------------------|----------------------------------------------|-----------------------------------------------|----------------------------------------------|----------------------------------------------|----------------------------------------------|-----------------------------------------------|----------------------------------------------|----------------------------------------------|----------------------------------------------|-----------------------------------------------|----------------------------------------------|
| Data<br>Attribut<br>able<br>fraction<br>cutoff<br>conside<br>red | GEMS                                         | 0.3                                          | 0.3                                          | 0.3                                           | 0.3                                          | 0.5                                          | 0.5                                          | 0.5                                           | 0.5                                          | 0.7                                          | 0.7                                          | 0.7                                           | 0.7                                          |
| Patient<br>Subset                                                | 0-59mo<br>(main<br>text<br>model)            | main +<br>Y/N<br>Shigella<br>*               | main +<br>Y/N<br>crypto*                     | Main +<br>Y/N<br>Shigella<br>+ Y/N<br>crypto* | main +<br>Y/N<br>any<br>viral**              | main +<br>Y/N<br>Shigella<br>*               | main +<br>Y/N<br>crypto*                     | Main +<br>Y/N<br>Shigella<br>+ Y/N<br>crypto* | main +<br>Y/N<br>any<br>viral**              | main +<br>Y/N<br>Shigella<br>*               | main +<br>Y/N<br>crypto*                     | Main +<br>Y/N<br>Shigella<br>+ Y/N<br>crypto* | main +<br>Y/N<br>any<br>viral**              |
| AUCs                                                             | <b>0.72</b><br><b>(0.72,</b><br><b>0.72)</b> | <b>0.73</b><br><b>(0.73,</b><br><b>0.74)</b> | <b>0.73</b><br><b>(0.73,</b><br><b>0.74)</b> | <b>0.73</b><br><b>(0.73,</b><br><b>0.74)</b>  | <b>0.73</b><br><b>(0.73,</b><br><b>0.74)</b> | <b>0.73</b><br><b>(0.73,</b><br><b>0.74)</b> | <b>0.73</b><br><b>(0.73,</b><br><b>0.73)</b> | <b>0.73</b><br><b>(0.73,</b><br><b>0.74)</b>  | <b>0.73</b><br><b>(0.73,</b><br><b>0.74)</b> | <b>0.73</b><br><b>(0.73,</b><br><b>0.74)</b> | <b>0.73</b><br><b>(0.73,</b><br><b>0.74)</b> | <b>0.73</b><br><b>(0.73,</b><br><b>0.74)</b>  | <b>0.73</b><br><b>(0.73,</b><br><b>0.74)</b> |
|                                                                  | 0.72<br>(0.71,<br>0.73)                      | 0.73<br>(0.73,<br>0.74)                      | 0.73<br>(0.73,<br>0.73)                      | 0.73<br>(0.73,<br>0.74)                       | 0.73<br>(0.73,<br>0.73)                      | 0.73<br>(0.73,<br>0.73)                      | 0.73,<br>(0.73,<br>0.73)                     | 0.73<br>(0.73,<br>0.74)                       | 0.73<br>(0.73,<br>0.74)                      | 0.73<br>(0.73,<br>0.73)                      | 0.73,<br>(0.73,<br>0.74)                     | 0.73<br>(0.73,<br>0.73)                       | 0.73<br>(0.73,<br>0.73)                      |
| 1                                                                | Age<br>(months<br>)                          | Age<br>(months<br>)                          | Age<br>(months<br>)                          | Age<br>(months<br>)                           | Age<br>(months<br>)                          | Age<br>(months<br>)                          | Age<br>(months<br>)                          | Age<br>(months<br>)                           | Age<br>(months<br>)                          | Age<br>(months<br>)                          | Age<br>(months<br>)                          | Age<br>(months<br>)                           | Age<br>(months<br>)                          |
| 2                                                                | HAZ                                          | HAZ                                          | HAZ                                          | HAZ                                           | HAZ                                          | HAZ                                          | HAZ                                          | HAZ                                           | HAZ                                          | HAZ                                          | HAZ                                          | HAZ                                           | HAZ                                          |
| 3                                                                | Respirat<br>or rate                          | Resp<br>rate                                 | Resp<br>rate                                 | Resp<br>rate                                  | Resp<br>rate                                 | Resp<br>rate                                 | Resp<br>rate                                 | Resp<br>rate                                  | Resp<br>rate                                 | Resp<br>rate                                 | Resp<br>rate                                 | Resp<br>rate                                  | Resp<br>rate                                 |
| 4                                                                | Temper<br>ature                              | Temper<br>ature                              | Temper<br>ature                              | Temper<br>ature                               | Temper<br>ature                              | Temper<br>ature                              | Temper<br>ature                              | Temper<br>ature                               | Temper<br>ature                              | Temper<br>ature                              | Temper<br>ature                              | Temper<br>ature                               | Temper<br>ature                              |
| 5                                                                | Num.<br>people<br>living in<br>househo<br>ld | Num.<br>people<br>living in<br>househo<br>ld | Num.<br>people<br>living in<br>househo<br>ld | Num.<br>people<br>living in<br>househo<br>ld  | Num.<br>people<br>living in<br>househo<br>ld | Num.<br>people<br>living in<br>househo<br>ld | Num.<br>people<br>living in<br>househo<br>ld | Num.<br>people<br>living in<br>househo<br>ld  | Num.<br>people<br>living in<br>househo<br>ld | Num.<br>people<br>living in<br>househo<br>ld | Num.<br>people<br>living in<br>househo<br>ld | Num.<br>people<br>living in<br>househo<br>ld  | Num.<br>people<br>living in<br>househo<br>ld |
| 6                                                                | Num.<br>rooms<br>used for<br>sleeping        | Num.<br>days of<br>diarrhea<br>at            | Num.<br>days of<br>diarrhea<br>at            | Num.<br>days of<br>diarrhea<br>at             | Num.<br>days of<br>diarrhea<br>at            | Num.<br>days of<br>diarrhea<br>at            | Num.<br>days of<br>diarrhea<br>at            | Breastfe<br>d                                 | Num.<br>days of<br>diarrhea<br>at            | Num.<br>days of<br>diarrhea<br>at            | Num.<br>days of<br>diarrhea<br>at            | Num.<br>days of<br>diarrhea<br>at             | Breastfe<br>d                                |

|                     |                                                                                     | presenta<br>tion                                                                    | presenta<br>tion                                                                    | presenta<br>tion                                                                    | presenta<br>tion                                                                    | presenta<br>tion                                                                    | presenta<br>tion                                                                    |                                                                                     | presenta<br>tion                                                                    | presenta<br>tion                                                                    | presenta<br>tion                                                                    | presenta<br>tion                                                                    |                                                                                     |
|---------------------|-------------------------------------------------------------------------------------|-------------------------------------------------------------------------------------|-------------------------------------------------------------------------------------|-------------------------------------------------------------------------------------|-------------------------------------------------------------------------------------|-------------------------------------------------------------------------------------|-------------------------------------------------------------------------------------|-------------------------------------------------------------------------------------|-------------------------------------------------------------------------------------|-------------------------------------------------------------------------------------|-------------------------------------------------------------------------------------|-------------------------------------------------------------------------------------|-------------------------------------------------------------------------------------|
| 7                   | Num.<br>days of<br>diarrhea<br>at<br>presenta<br>tion                               | Num.<br>rooms<br>used for<br>sleeping                                               | Breastfe<br>d                                                                       | Num.<br>rooms<br>used for<br>sleeping                                               | Num.<br>rooms<br>used for<br>sleeping                                               | Breastfe<br>d                                                                       | Breastfe<br>d                                                                       | Num.<br>days of<br>diarrhea<br>at<br>presenta<br>tion                               | Breastfe<br>d                                                                       | Breastfe<br>d                                                                       | Breastfe<br>d                                                                       | Num.<br>rooms<br>used for<br>sleeping                                               | Num.<br>days of<br>diarrhea<br>at<br>presenta<br>tion                               |
| 8                   | Num.<br>other<br>househo<br>lds that<br>share<br>same<br>fecal<br>waste<br>facility | Breastfe<br>d                                                                       | Num.<br>rooms<br>used for<br>sleeping                                               | Breastfe<br>d                                                                       | Breastfe<br>d                                                                       | Num.<br>rooms<br>used for<br>sleeping                                               | Num.<br>rooms<br>used for<br>sleeping                                               | Num.<br>rooms<br>used for<br>sleeping                                               | Num.<br>rooms<br>used for<br>sleeping                                               | Num.<br>rooms<br>used for<br>sleeping                                               | Num.<br>rooms<br>used for<br>sleeping                                               | Breastfe<br>d                                                                       | Num.<br>rooms<br>used for<br>sleeping                                               |
| 9                   | Breastfe<br>d                                                                       | Num.<br>other<br>househo<br>lds that<br>share<br>same<br>fecal<br>waste<br>facility | Num.<br>other<br>househo<br>lds that<br>share<br>same<br>fecal<br>waste<br>facility | Num.<br>other<br>househo<br>lds that<br>share<br>same<br>fecal<br>waste<br>facility | Num.<br>other<br>househo<br>lds that<br>share<br>same<br>fecal<br>waste<br>facility | Num.<br>other<br>househo<br>lds that<br>share<br>same<br>fecal<br>waste<br>facility | Num.<br>other<br>househo<br>lds that<br>share<br>same<br>fecal<br>waste<br>facility | Num.<br>other<br>househo<br>lds that<br>share<br>same<br>fecal<br>waste<br>facility | Num.<br>other<br>househo<br>lds that<br>share<br>same<br>fecal<br>waste<br>facility | Num.<br>other<br>househo<br>lds that<br>share<br>same<br>fecal<br>waste<br>facility | Num.<br>other<br>househo<br>lds that<br>share<br>same<br>fecal<br>waste<br>facility | Num.<br>other<br>househo<br>lds that<br>share<br>same<br>fecal<br>waste<br>facility | Num.<br>other<br>househo<br>lds that<br>share<br>same<br>fecal<br>waste<br>facility |
| 10                  | Num.<br>children<br><60mon<br>ths live<br>in<br>househo<br>ld                       | Num.<br>children<br><60mon<br>ths live<br>in<br>househo<br>ld                       | Num.<br>children<br><60mon<br>ths live<br>in<br>househo<br>ld                       | Num.<br>children<br><60mon<br>ths live<br>in<br>househo<br>ld                       | Num.<br>children<br><60mon<br>ths live<br>in<br>househo<br>ld                       | Num.<br>children<br><60mon<br>ths live<br>in<br>househo<br>ld                       | Num.<br>children<br><60mon<br>ths live<br>in<br>househo<br>ld                       | Num.<br>children<br><60mon<br>ths live<br>in<br>househo<br>ld                       | Num.<br>children<br><60mon<br>ths live<br>in<br>househo<br>ld                       | Num.<br>children<br><60mon<br>ths live<br>in<br>househo<br>ld                       | Num.<br>children<br><60mon<br>ths live<br>in<br>househo<br>ld                       | Num.<br>children<br><60mon<br>ths live<br>in<br>househo<br>ld                       | Num.<br>children<br><60mon<br>ths live<br>in<br>househo<br>ld                       |
| Rank of<br>addition | n/a                                                                                 | 33 <sup>rd</sup>                                                                    | 18 <sup>th</sup>                                                                    | 19 <sup>th</sup><br>(crypto)                                                        | 22 <sup>nd</sup>                                                                    | 49 <sup>th</sup>                                                                    | 20 <sup>th</sup>                                                                    | 22 <sup>nd</sup><br>(crypto)                                                        | 26 <sup>th</sup>                                                                    | 60 <sup>th</sup>                                                                    | 56 <sup>th</sup>                                                                    | 52 <sup>nd</sup><br>(crypto)                                                        | 26 <sup>th</sup>                                                                    |

|                |  |  |  |                                    |  |  |  |                                    |  |  |  |                                    |  |
|----------------|--|--|--|------------------------------------|--|--|--|------------------------------------|--|--|--|------------------------------------|--|
| al<br>variable |  |  |  | 30 <sup>th</sup><br>(shigell<br>a) |  |  |  | 48 <sup>th</sup><br>(shigell<br>a) |  |  |  | 62 <sup>nd</sup><br>(shigell<br>a) |  |
|----------------|--|--|--|------------------------------------|--|--|--|------------------------------------|--|--|--|------------------------------------|--|

\*n=4277 due to missing etiology data

\*\*viral etiology include astrovirus, norovirus GII, rotavirus, sapovirus, and adenovirus, n=4277 due to missing etiology data

|      | The Gambia                                | Mali                            | Mozambique            | Kenya                                 | India                                                      | Bangladesh                                     | Pakistan                                  | Fit in data from Africa         | Fit in data from Asia                                      |
|------|-------------------------------------------|---------------------------------|-----------------------|---------------------------------------|------------------------------------------------------------|------------------------------------------------|-------------------------------------------|---------------------------------|------------------------------------------------------------|
| AUCs |                                           |                                 | sample size too small |                                       |                                                            |                                                |                                           | 0.72 (0.72, 0.73)               | 0.70 (0.70, 0.70)                                          |
|      | <b>0.67 (0.66, 0.67)</b>                  | <b>0.82 (0.82, 0.83)</b>        |                       | <b>0.71 (0.70, 0.72)</b>              | <b>0.76 (0.75, 0.76)</b>                                   | <b>0.71 (0.71, 0.72)</b>                       | <b>0.68 (0.67, 0.69)</b>                  | <b>0.73 (0.72, 0.73)</b>        | <b>0.72 (0.71, 0.72)</b>                                   |
|      | <i>0.69 (0.68, 0.70)</i>                  | <i>0.82 (0.81, 0.82)</i>        |                       | <i>0.72 (0.71, 0.72)</i>              | <i>0.77 (0.76, 0.78)</i>                                   | <i>0.70 (0.70, 0.71)</i>                       | <i>0.68 (0.67, 0.69)</i>                  | <i>0.73 (0.72, 0.73)</i>        | <i>0.72 (0.72, 0.72)</i>                                   |
| 1    | HAZ                                       | Age                             |                       | Age                                   | HAZ                                                        | Age                                            | Age                                       | Age                             | Age                                                        |
| 2    | Age                                       | HAZ                             |                       | HAZ                                   | Age                                                        | HAZ                                            | HAZ                                       | HAZ                             | HAZ                                                        |
| 3    | Respiratory rate                          | Respiratory rate                |                       | Respiratory rate                      | Temperature                                                | Respiratory rate                               | Temperature                               | Respiratory rate                | Respiratory rate                                           |
| 4    | Num. people living in household           | Temperature                     |                       | Temperature                           | Respiratory rate                                           | Temperature                                    | Respiratory rate                          | Temperature                     | Temperature                                                |
| 5    | Temperature                               | Breastfed                       |                       | Breastfed                             | Num. other households that share same fecal waste facility | Num. people living in household                | Num. people living in household           | Num. people living in household | Num. people living in household                            |
| 6    | Num. rooms used for sleeping              | Num. people living in household |                       | Num. days of diarrhea at presentation | Num. people living in household                            | Num. days of diarrhea at presentation          | Num. days of diarrhea at presentation     | Breastfed                       | Num. other households that share same fecal waste facility |
| 7    | Num. children <60months live in household | Num. rooms used for sleeping    |                       | Num. people living in household       | Num. days of diarrhea at presentation                      | Type of fecal waste facility used by household | Num. children <60months live in household | Num. rooms used for sleeping    | Num. days of diarrhea at presentation                      |
| 8    | Num. days of diarrhea                     | Num. children <60months         |                       | Num. other households that share      | Caregiver education                                        | Num. rooms used for sleeping                   | Num. rooms used for sleeping              | Num. days of diarrhea           | Num. rooms used for sleeping                               |

|    |                                       |                                                            |  |                                           |                                  |                                                            |                                       |                                                            |                                                |
|----|---------------------------------------|------------------------------------------------------------|--|-------------------------------------------|----------------------------------|------------------------------------------------------------|---------------------------------------|------------------------------------------------------------|------------------------------------------------|
|    | at presentation                       | live in household                                          |  | same fecal waste facility                 |                                  |                                                            |                                       | at presentation                                            |                                                |
| 9  | How much offering child to drink      | Num. other households that share same fecal waste facility |  | How much offering child to drink          | Num. rooms used for sleeping     | Num. other households that share same fecal waste facility | Caregiver education                   | Num. children <60months live in household                  | Caregiver education                            |
| 10 | How often main water source available | Num. days of diarrhea at presentation                      |  | Num. children <60months live in household | How much offering child to drink | Caregiver education                                        | Child receive recommended rehydration | Num. other households that share same fecal waste facility | Type of fecal waste facility used by household |
|    |                                       |                                                            |  |                                           |                                  |                                                            |                                       | 2-variable CPR performance in data from Asia               | 2-variable CPR performance in data from Africa |
|    |                                       |                                                            |  |                                           |                                  |                                                            |                                       | 0.70 (0.68, 0.72)                                          | 0.72 (0.71, 0.74)                              |

## REFERENCES

1. Bank TW. Metadata Glossary: Improved water source (% of population with access).
2. Progress on household drinking water, sanitation and hygiene 2000-2020: Five years into the SDGs. Geneva: World Health Organization (WHO) and the United Nations Children's Fund (UNICEF); 2021.
